# Supplementary material for: Eimeria maxima Rhomboid-like Protein 5 Provided Partial Protection against Homologous Challenge in Forms of Recombinant Protein and DNA Plasmid in Chickens
Source: MDPI journal article supplement (doi:10.3390/vaccines10010032), 2021-12-27
Supplement: s1 [file s1]

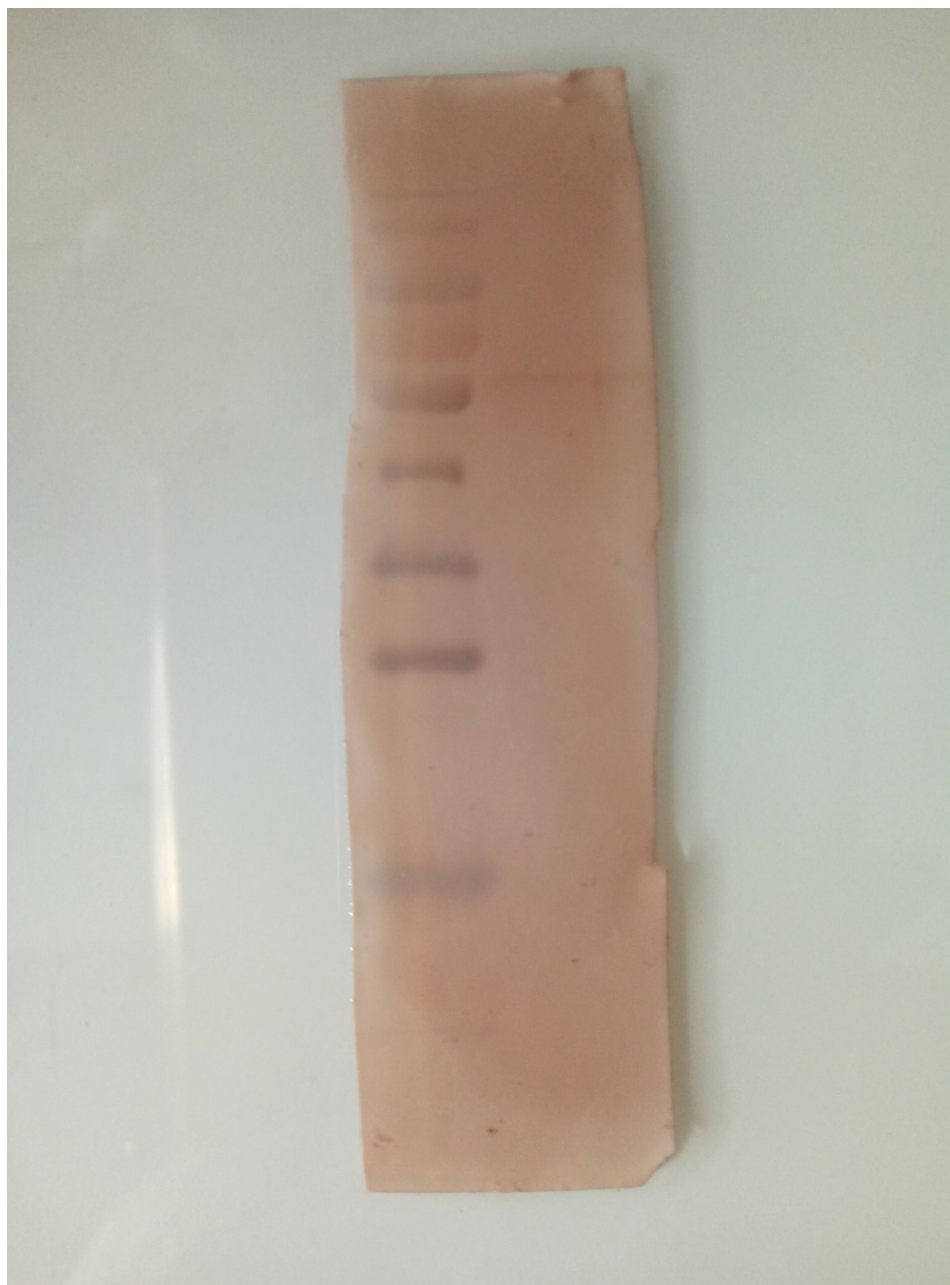

**Figure S1.** The original image for figure 2C lane 1 in the main article.

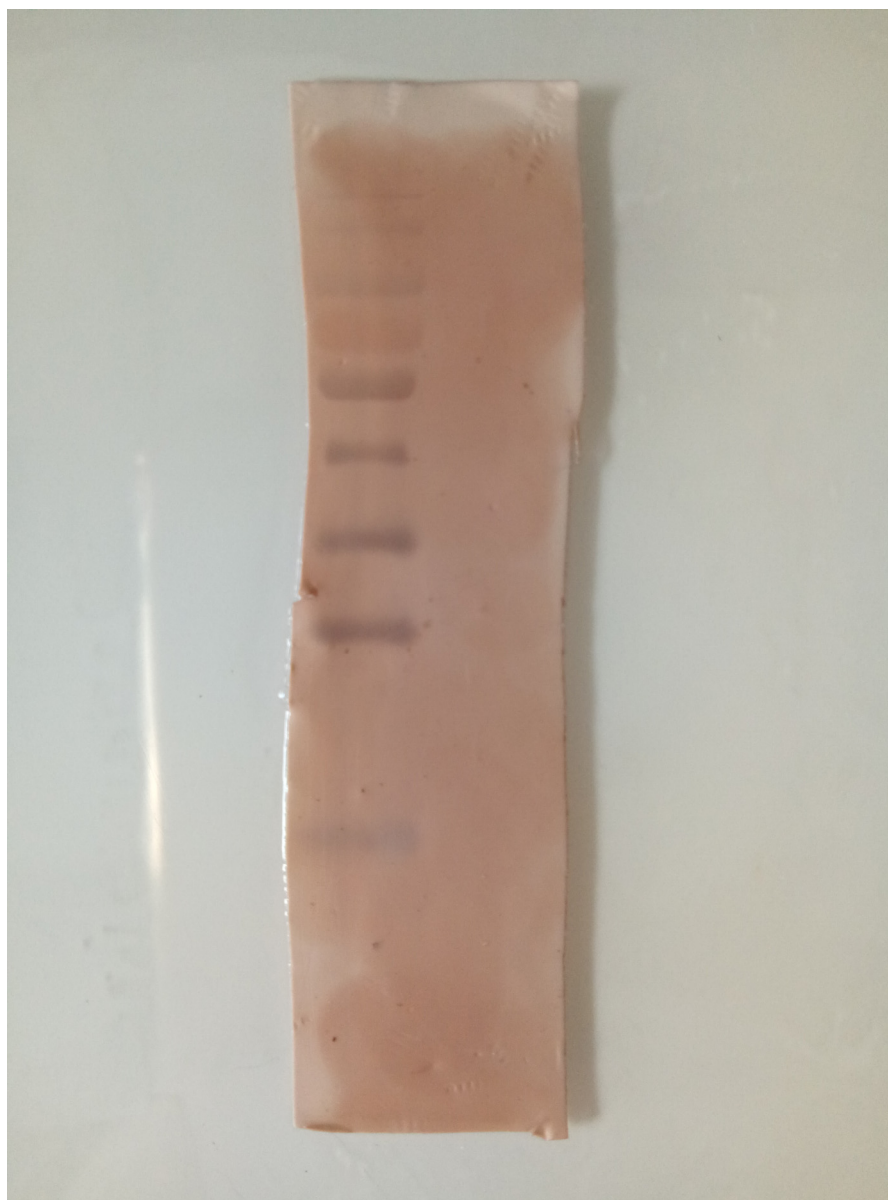

**Figure S2.** The original image for figure 2C lane 2 in the main article.

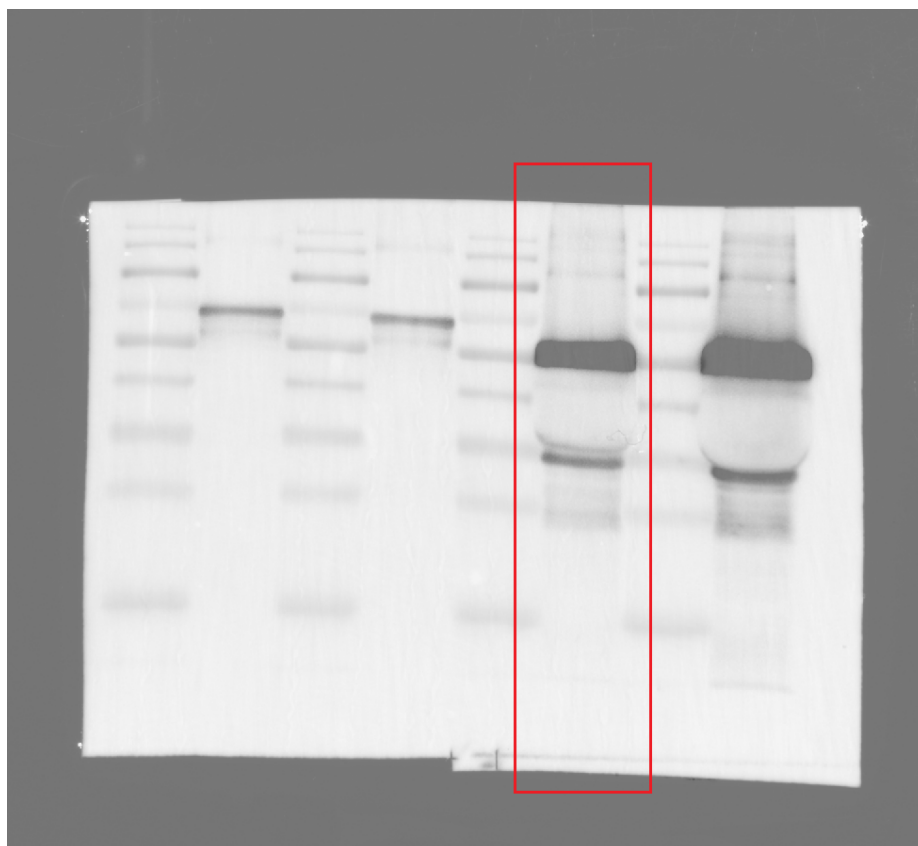

**Figure S3.** The original image for figure 2C lane 3 in the main article.

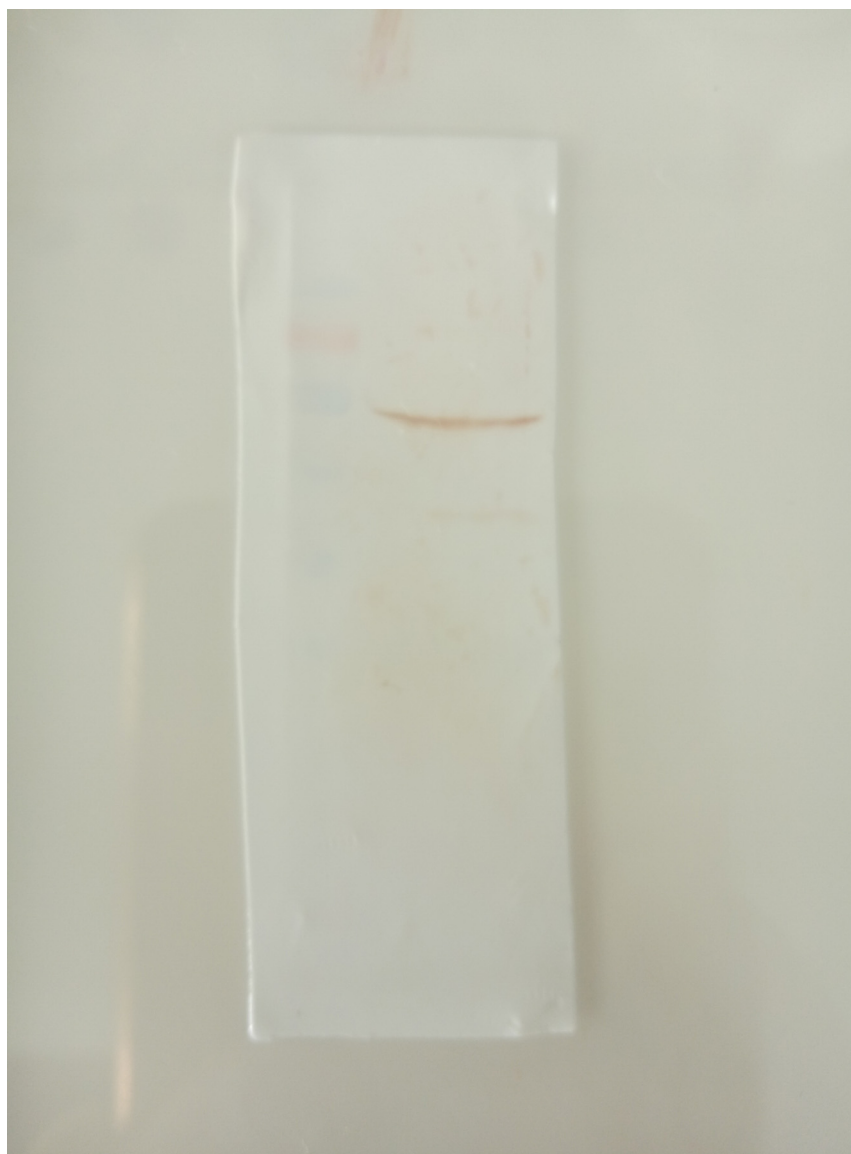

**Figure S4.** The original image for figure 3B lane 1 in the main article.

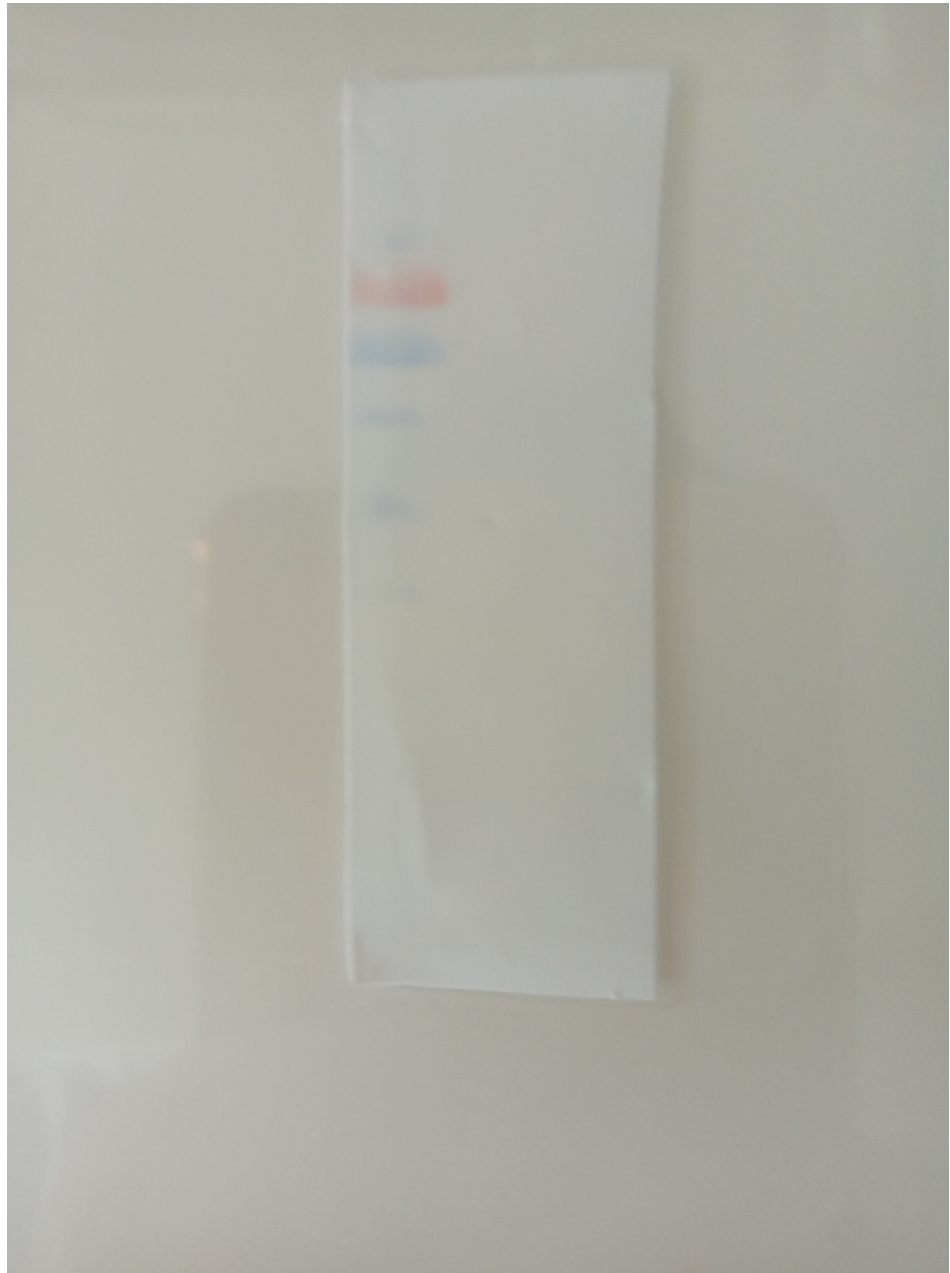

**Figure S5.** The original image for figure 3B lane 2 in the main article.
